# Supplementary material for: Evaluating reproducibility of AI algorithms in digital pathology with DAPPER
Source: PubMed Central journal article supplement (PMC6467397; doi:10.1371/journal.pcbi.1006269), 2019-03-27
Supplement: pcbi.1006269.s004.pdf [file pcbi.1006269.s004.pdf]

## FCH

Opt. method

ACC

MCC

**FIX****93.7****0.921**

STEP

88.4

0.854

POLY

91.1

0.888
